# Supplementary material for: Theoretical characterization of two-photon fluorescent probes for nitric oxide detection: sensing mechanism, photophysical properties and protonation effects
Source: Royal Society of Chemistry journal article supplement (doi:10.1039/d3cp01091k), 2023-01-01
Supplement: d3cp01091k1.pdf [file d3cp01091k1.pdf]

## Supplementary Information for

### **Theoretical characterizations of the two-photon fluorescent probes for nitric oxide detection: sensing mechanism, photophysical properties and protonation effects**

Yawen Jiao,<sup>†a</sup> Xiaoxu Dong,<sup>‡a</sup> Xin Ran,<sup>‡a</sup> Qiyun Deng,<sup>b</sup> Haibin Xiao,<sup>a</sup> Zhiming Wang<sup>\*b</sup> and Tian Zhang<sup>\*a</sup>

<sup>a</sup>School of Chemistry and Chemical Engineering, Shandong University of Technology, Zibo 255049, China. E-mail: [tzhang@sdut.edu.cn](mailto:tzhang@sdut.edu.cn)

<sup>b</sup>AIE institute, State Key Laboratory of Luminescent Materials and Devices, Center for Aggregation-Induced Emission, Guangdong Provincial Key Laboratory of Luminescence from Molecular Aggregates, South China University of Technology, Guangzhou 510640, China. E-mail: [wangzhiming@scut.edu.cn](mailto:wangzhiming@scut.edu.cn)

<sup>†</sup> Electronic supplementary information (ESI) available.

<sup>‡</sup> These authors contributed equally.

# *Contents*

I. Theoretical formalism for NACME

II. Broadening function for the TPA lineshape

III. Energy gap law for non-radiative transitions

IV. Few-state models for two-photon transition matrix element

V. Detailed analyses of TPA properties using the few-state models

Supplementary figures and tables

Supplementary references

## I. Theoretical formalism for NACME

The non-adiabatic electronic coupling matrix element (NACME), *i.e.*,  $R_{kl}$  matrix in eqn (3) was treated as a product of the derivative coupling  $R_{kl} = \langle \Phi_f | \hat{P}_{lk} | \Phi_i \rangle \langle \Phi_i | \hat{P}_{il} | \Phi_f \rangle$ , which can be solved via the first-order perturbation theory following Lin *et al.* At the equilibrium position approximately, we get: <sup>S1</sup>

$$\langle \Phi_f | \hat{P}_{il} | \Phi_i \rangle = -i\hbar \langle \Phi_f | \frac{\partial}{\partial Q_{il}} | \Phi_i \rangle = -i\hbar \frac{\langle \Phi_f^0 | \partial \hat{U} / \partial Q_{il} | \Phi_i^0 \rangle}{E_i^0 - E_f^0} \quad (\text{S1})$$

where

$$\langle \Phi_f^0 | \partial \hat{U} / \partial Q_{il} | \Phi_i^0 \rangle = -\sum_{\sigma} \frac{Z_{\sigma} e^2}{\sqrt{M_{\sigma}}} \sum_{\tau=x,y,z} E_{f \leftarrow i, \sigma \tau} L_{\sigma \tau, l} \quad (\text{S2})$$

The transition electric field  $E_{f \leftarrow i, \sigma \tau} = \int d\mathbf{r} \rho_{fi}^0(\mathbf{r}) \frac{\mathbf{e}(\mathbf{r}_{\tau} - \mathbf{R}_{\sigma \tau})}{|\mathbf{r} - \mathbf{R}_{\sigma}|^3}$  can be computed at the TD-DFT level in the Gaussian 16 package, and U is the electron-nuclear potential term in the Hamiltonian.

## II. Broadening function for the TPA lineshape

The macroscopic TPA cross section can be obtained from the rotationally averaged TPA strength  $\delta_{\text{tp}}$  in eqn (6) using: <sup>S2</sup>

$$\sigma_{\text{tpa}} = \frac{4\pi^3 \alpha a_0^5 \omega^2}{c} \delta_{\text{tp}} g(2\omega, \omega_{\text{if}}, \Gamma) \quad (\text{S3})$$

The lineshape function  $g(2\omega, \omega_{\text{if}}, \Gamma)$  describes broadening effects with an empirical damping parameter  $\Gamma$  to describe the spectral broadening of an excitation. Herein, a Lorentzian lineshape function is used for  $g(2\omega, \omega_{\text{if}}, \Gamma)$ .

$$g(2\omega) = \frac{1}{\pi} \frac{\Gamma}{(2\omega - \omega_{\text{if}})^2 + \Gamma^2} \quad (\text{S4})$$

where  $\omega$  is the photon energy,  $\omega_{\text{if}}$  is the excitation energy and  $\Gamma$  is the half width at half maximum (HWHM). The function is normalized to one. By setting  $\omega = \omega_{\text{if}}/2$ , the maximum of the Lorentzian is obtained as,

$$g(\omega_{\text{if}}) = \frac{1}{\pi \Gamma} \quad (\text{S5})$$

When this maximum is inserted for  $g(2\omega, \omega_{if}, \Gamma)$  in eqn (S3), one obtains eqn (7) in the main text.

### III. Energy gap law for non-radiative transitions

In 1950, Huang and Rhys proposed the theory of multiphonon non-radiative transitions, originally developed for the light-emitting from the color center in solids.<sup>S3</sup>

In 1970, Englman and Jortner presented the energy gap law for non-radiative transitions in the strong and weak coupling limits.<sup>S4</sup> In the strong coupling limit, the transition probability is determined by a gaussian function of the energy parameter  $(\Delta E - E_M)$ , where  $\Delta E$  is the energy gap between the origins of the two electronic states and  $2E_M$  is the Stokes shift. The weak coupling limit reveals an exponential (or rather superexponential) dependence of the transition probability on the energy gap  $\Delta E$ . Indeed, the weak coupling limit prevails for electronic relaxation in large aromatic molecules, while the study of the strong coupling case is of interest for the understanding of unimolecular photochemical reactions which take place in excited electronic states of large molecules.

The non-radiative transition probability is given by:

$$W = \frac{C^2}{\hbar^2} \exp(-G) \int_{-\infty}^{\infty} \exp \left[ -\frac{i\Delta E t}{\hbar} + G_+(t) + G_-(t) \right] dt \quad (S6)$$

Note that this result exhibits the dependence of  $W$  on the energy gap  $\Delta E$ .

When the weak coupling limit is encountered, the following result is obtained:

$$W = \frac{C^2 \sqrt{2\pi}}{\hbar \sqrt{(\hbar \omega_M \Delta E)}} \exp \left( -\frac{1}{2} \sum_j \Delta_j^2 \right) \exp \left\{ -\frac{\Delta E}{\hbar \omega_M} \left[ \log \left( \frac{2\Delta E}{\sum_M \hbar \omega_M \Delta_M^2} \right) - 1 \right] \right\} \quad (S7)$$

Let

$$de_M = \frac{1}{2} \sum_{M=1, \dots, d} \hbar \omega_M \Delta_M^2 \quad (S8)$$

be the contribution of the modes of maximum frequency to  $E_M$ , and we assume that there is the same

contribution from each of the  $d$  normal modes so that  $e_M = \frac{1}{2} \hbar \omega_M \Delta_M^2$ . Then eqn (S7) can be rewritten in the form:

$$W = \frac{C^2 \sqrt{(2\pi)}}{\hbar \sqrt{(\hbar \omega_M \Delta E)}} \exp(-E_M / \hbar \langle \omega \rangle) \exp \left\{ -\frac{\Delta E}{\hbar \omega_M} \left[ \log \left( \frac{\Delta E}{de_M} \right) - 1 \right] \right\} \quad (\text{S9})$$

This low temperature result is adequate either for the isolated molecule or for a molecule in an inert medium. eqn (S7) exhibits the energy gap law for the weak coupling limit. As  $G \lesssim 1$  we set  $\exp(-G) \sim 1$ . Furthermore, as in eqn (S9)  $\log(\Delta E/de_M) > 1$ , we expect that the parameter:

$$\gamma \equiv \gamma(\Delta E, e_M, d) = \log \left( \frac{\Delta E}{de_M} \right) - 1 \quad (\text{S10})$$

is positive so that  $W$  assumes the form:

$$W = \frac{C^2 \sqrt{(2\pi)}}{\hbar \sqrt{(\hbar \omega_M \Delta E)}} \exp(-\gamma \Delta E / \hbar \omega_M) \quad (\text{S11})$$

This result exhibits a rough exponential (or rather somewhat stronger than exponential) dependence of the transition probability on the energy gap.

#### IV. Few-state models for two-photon transition matrix element

Few-states models are obtained by truncating the summations in eqn (5) to include a finite number of excited states.

(I) Assuming  $k = i, f$ ,  $\omega = \omega_{if}/2$ , the two-state model can be written as:

$$S_{(2\text{-state})} = \frac{\langle i | \hat{\mu}_\alpha | i \rangle \langle i | \hat{\mu}_\beta | f \rangle}{-\omega_{if}/2} + \frac{\langle i | \hat{\mu}_\beta | i \rangle \langle i | \hat{\mu}_\alpha | f \rangle}{-\omega_{if}/2} + \frac{\langle i | \hat{\mu}_\alpha | f \rangle \langle f | \hat{\mu}_\beta | f \rangle}{\omega_{if}/2} + \frac{\langle i | \hat{\mu}_\beta | f \rangle \langle f | \hat{\mu}_\alpha | f \rangle}{\omega_{if}/2} = \frac{2\mu_{if}\Delta\mu}{\omega_{if}/2}$$

So that one obtains eqn (9) in the main text.

(II) Assuming  $k = i, m, f$ ,  $\omega = \omega_{if}/2$ , the three-state model can be expressed as:

$$S_{(3\text{-state})} = S_{(2\text{-state})} + \frac{\langle i | \hat{\mu}_\alpha | m \rangle \langle m | \hat{\mu}_\beta | f \rangle + \langle i | \hat{\mu}_\beta | m \rangle \langle m | \hat{\mu}_\alpha | f \rangle}{\omega_{im} - \omega_{if}/2} = \frac{2\mu_{if}\Delta\mu}{\omega_{if}/2} + \frac{2\mu_{im}\mu_{mf}}{\omega_{im} - \omega_{if}/2}$$

So that one obtains eqn (10) in the main text.

(III) Assuming  $k = i, m, n, f$ ,  $\omega = \omega_{if}/2$ , the four-state model can be formulated as:

$$S_{(4\text{-state})} = S_{(3\text{-state})} + \frac{\langle i | \hat{\mu}_\alpha | n \rangle \langle n | \hat{\mu}_\beta | f \rangle + \langle i | \hat{\mu}_\beta | n \rangle \langle n | \hat{\mu}_\alpha | f \rangle}{\omega_{in} - \omega_{if}/2} = \frac{2\mu_{if}\Delta\mu}{\omega_{if}/2} + \frac{2\mu_{im}\mu_{mf}}{\omega_{im} - \omega_{if}/2} + \frac{2\mu_{in}\mu_{nf}}{\omega_{in} - \omega_{if}/2}$$

So that one obtains eqn (11) in the main text.

## V. Detailed analyses of TPA properties using the few-state models

(I) In the case of the TPA into a state with a major  $\mu_{if}$ , the two-state model can be implemented:

For NINO (final state is  $S_2$ ),  $\mu_{02} = 2.14$  a.u.,  $\Delta\mu = \mu_{22} - \mu_{00} = (5.16 - 3.19)$  a.u. = 1.97 a.u., and  $\omega_{02} = 2.96$  eV = 0.11 a.u.

$$S_{(2\text{-state})} = \frac{2\mu_{02}\Delta\mu}{\omega_{02}/2} = \frac{2 \times 2.14 \times 1.97}{0.11/2} \text{ a.u.} = 153.3 \text{ a.u.}$$

For NINO-TZ (final state is  $S_1$ ),  $\mu_{01} = 1.73$  a.u.,  $\Delta\mu = \mu_{11} - \mu_{00} = (12.10 - 4.81)$  a.u. = 7.29 a.u., and  $\omega_{01} = 2.94$  eV = 0.11 a.u.

$$S_{(2\text{-state})} = \frac{2\mu_{01}\Delta\mu}{\omega_{01}/2} = \frac{2 \times 1.73 \times 7.29}{0.11/2} \text{ a.u.} = 458.6 \text{ a.u.}$$

For PYSNO (final state is  $S_1$ ),  $\mu_{01} = 2.65$  a.u.,  $\Delta\mu = \mu_{11} - \mu_{00} = (10.75 - 1.77)$  a.u. = 8.98 a.u.,  $\omega_{01} = 2.42$  eV = 0.09 a.u.

$$S_{(2\text{-state})} = \frac{2\mu_{01}\Delta\mu}{\omega_{01}/2} = \frac{2 \times 2.65 \times 8.98}{0.09/2} \text{ a.u.} = 1057.6 \text{ a.u.}$$

(II) In the case of the TPA into the  $S_2$  state with a minor  $\mu_{if}$ , the three-state model can be implemented:

For PYSNO,  $\mu_{02} = 1.36$  a.u.,  $\Delta\mu = \mu_{22} - \mu_{00} = (6.94 - 1.77)$  a.u. = 5.17 a.u., and  $\omega_{02} = 3.13$  eV = 0.12 a.u.;  $\mu_{01} = 2.65$  a.u.,  $\mu_{12} = 5.31$  a.u., and  $\omega_{01} - \omega_{02}/2 = (2.42 - 3.13/2)$  eV = 0.86 eV = 0.03 a.u.

$$S_{(3\text{-state})} = \frac{2\mu_{02}\Delta\mu}{\omega_{02}/2} + \frac{2\mu_{01}\mu_{12}}{\omega_{01} - \omega_{02}/2} = \left( \frac{2 \times 1.36 \times 5.17}{0.12/2} + \frac{2 \times 2.65 \times 5.31}{0.03} \right) \text{ a.u.} = (234.4 + 938.1) \text{ a.u.} = 1172.5 \text{ a.u.}$$

For PYSNO-TZ,  $\mu_{02} = 0.53$  a.u.,  $\Delta\mu = \mu_{22} - \mu_{00} = (5.98 - 2.36)$  a.u. = 3.62 a.u., and  $\omega_{02} = 3.42$  eV = 0.13 a.u.;  $\mu_{01} = 2.87$  a.u.,  $\mu_{12} = 6.18$  a.u., and  $\omega_{01} - \omega_{02}/2 = (2.80 - 3.42/2)$  eV = 1.09 eV = 0.04 a.u.

$$S_{(3\text{-state})} = \frac{2\mu_{02}\Delta\mu}{\omega_{02}/2} + \frac{2\mu_{01}\mu_{12}}{\omega_{01} - \omega_{02}/2} = \left( \frac{2 \times 0.53 \times 3.62}{0.13/2} + \frac{2 \times 2.87 \times 6.18}{0.04} \right) \text{ a.u.} = (59.0 + 886.8) \text{ a.u.} = 945.8 \text{ a.u.}$$

(III) In the case of the TPA into the  $S_3$  state with a minor  $\mu_{if}$ , the four-state model can be implemented:

For PYSNO,  $\mu_{03} = 0.48$  a.u.,  $\Delta\mu = \mu_{33} - \mu_{00} = (6.37 - 1.77)$  a.u. = 4.60 a.u., and  $\omega_{03} = 3.47$  eV = 0.13 a.u.;  $\mu_{01} = 2.65$  a.u.,  $\mu_{13} = 1.56$  a.u., and  $\omega_{01} - \omega_{03}/2 = (2.42 - 3.47/2)$  eV = 0.69 eV = 0.03 a.u.;  $\mu_{02} = 1.36$  a.u.,  $\mu_{23} = 7.42$  a.u., and  $\omega_{02} - \omega_{03}/2 = (3.13 - 3.47/2)$  eV = 1.40 eV = 0.05 a.u.

$$S_{(4\text{-state})} = \frac{2\mu_{03}\Delta\mu}{\omega_{03}/2} + \frac{2\mu_{01}\mu_{13}}{\omega_{01} - \omega_{03}/2} + \frac{2\mu_{02}\mu_{23}}{\omega_{02} - \omega_{03}/2} = \left( \frac{2 \times 0.48 \times 4.60}{0.13/2} + \frac{2 \times 2.65 \times 1.56}{0.03} + \frac{2 \times 1.36 \times 7.42}{0.05} \right) \text{ a.u.}$$

$$= (67.9 + 275.6 + 403.6) \text{ a.u.} = 747.1 \text{ a.u.}$$

**(a) NINO**

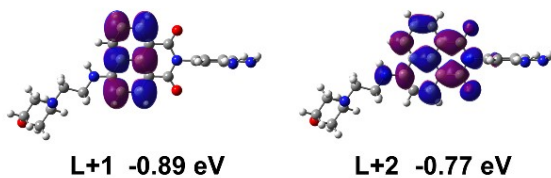

**(b) NINO**

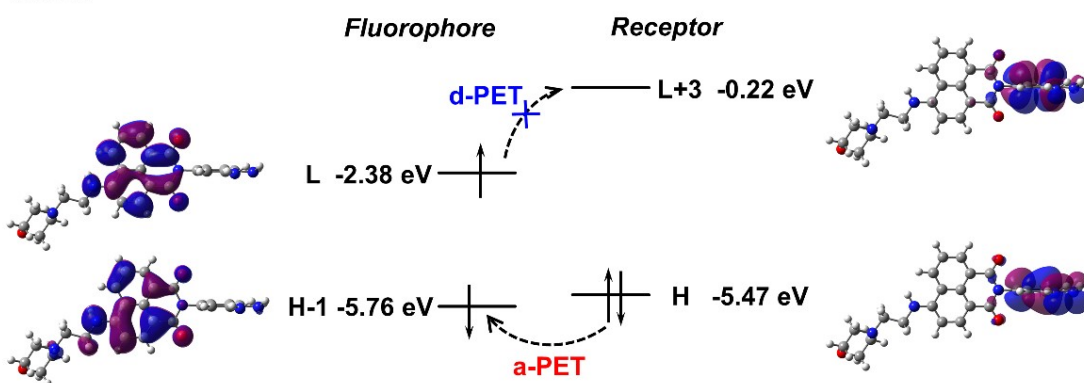

**(c) NINO-TZ**

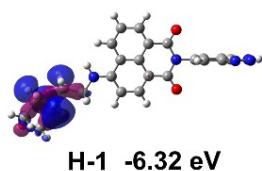

**(d) NINO-TZ**

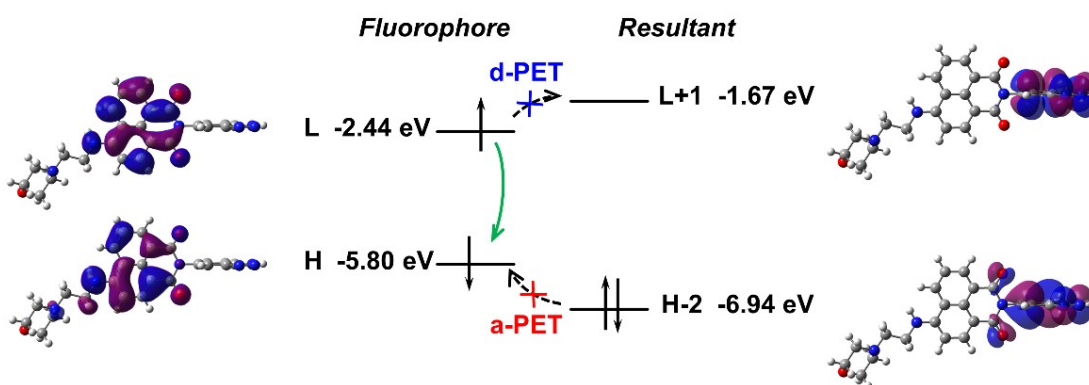

**Fig. S1** Eliminated orbitals during the mapping process (a, c) and orbital diagrams to display the “on/off” PET (b, d) for NINO and NINO-TZ.

(a) PYSNO

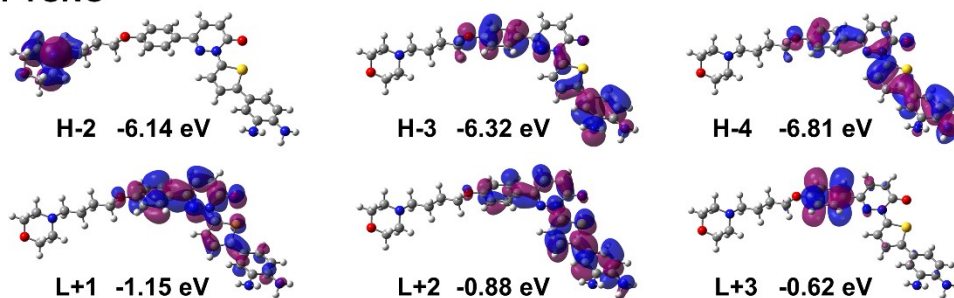

(b) PYSNO-TZ

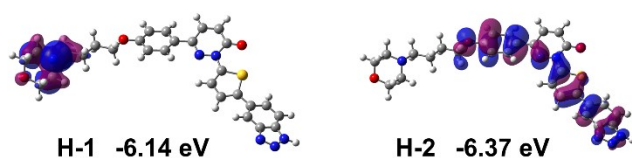

(c) PYSNO

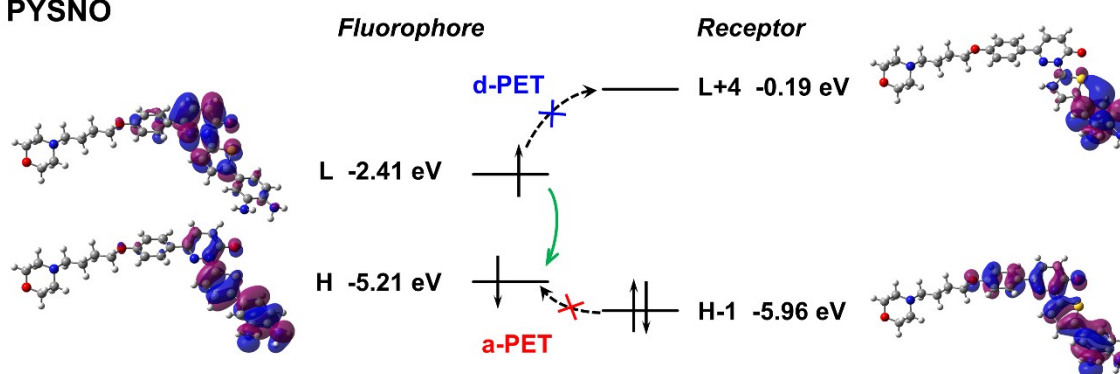

(d) PYSNO-TZ

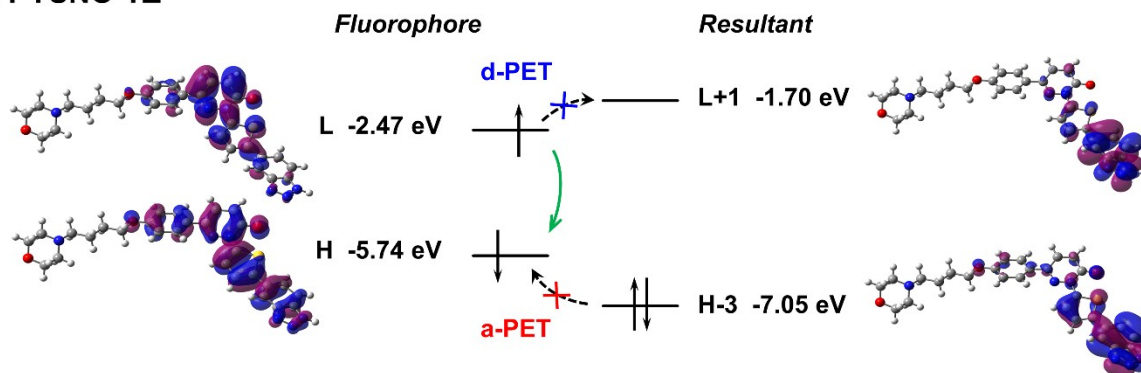

**Fig. S2** Eliminated orbitals during the mapping process (a, b) and orbital diagrams to display the “on/off” PET (c, d) for PYSNO and PYSNO-TZ.



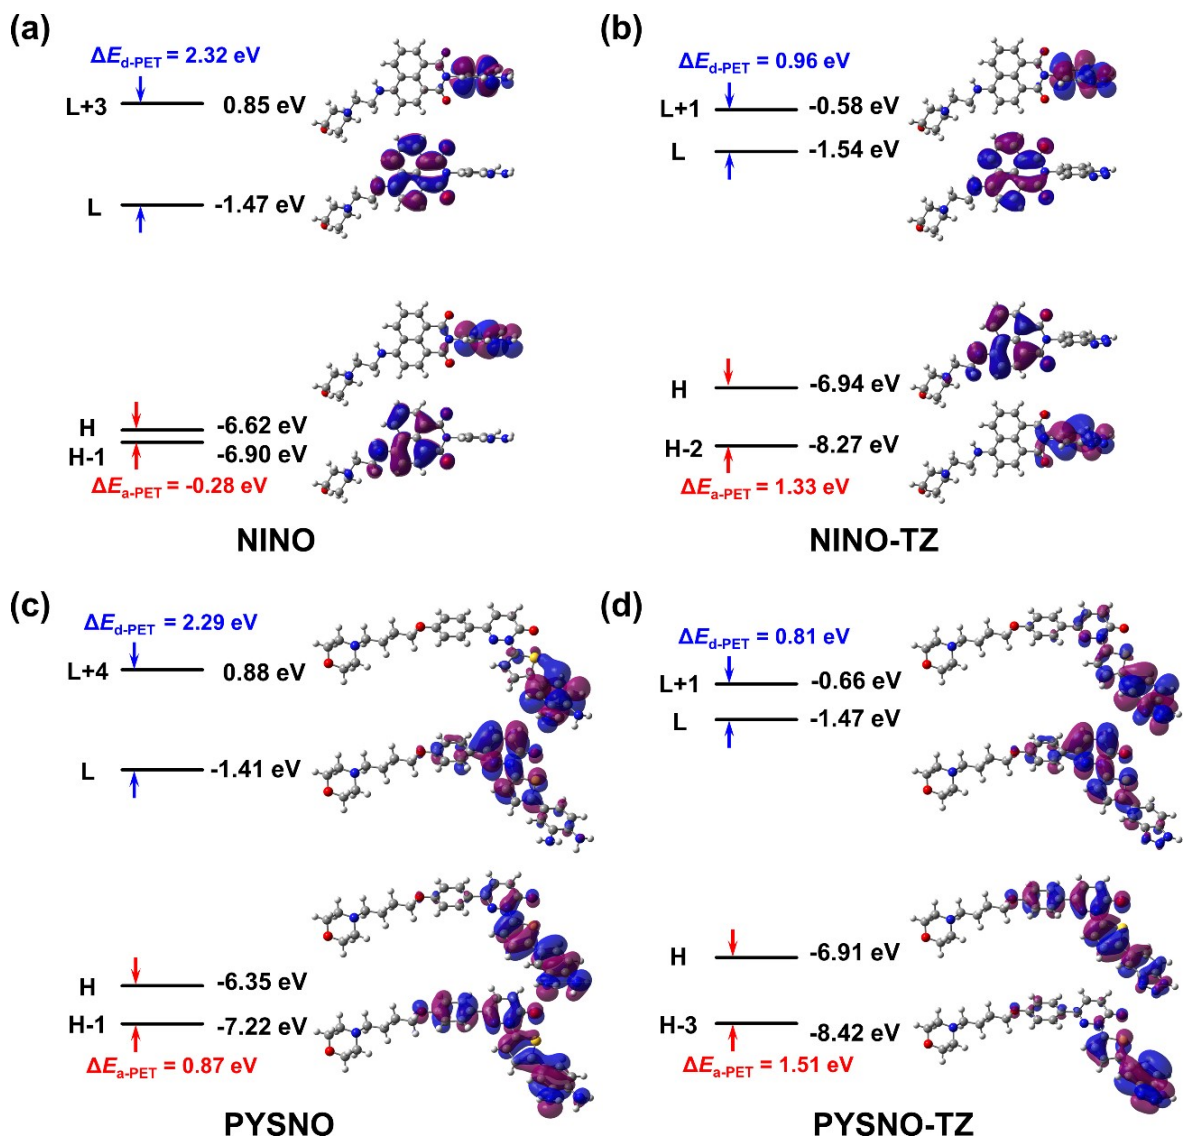

**Fig. S3** Four-level FMO diagrams with the spatial distributions for NINO (a), NINO-TZ (b), PYSNO (c) and PYSNO-TZ (d) at the M062X/def2SVP level.

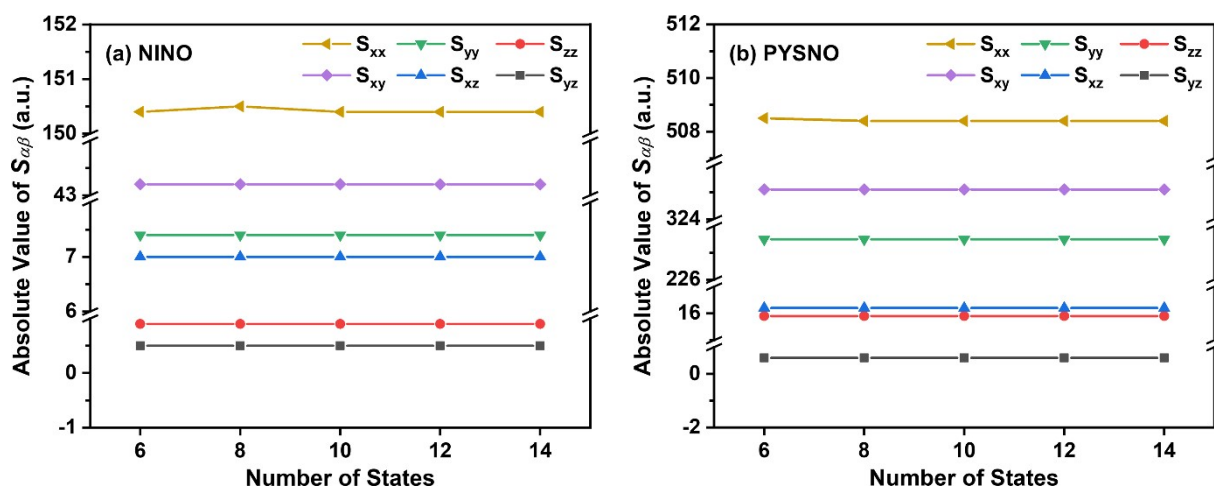

**Fig. S4** Absolute value of  $S_{\alpha\beta}$  (a.u.) versus number of states for the representative  $S_2$  states of NINO (a) and PYSNO (b) in water.

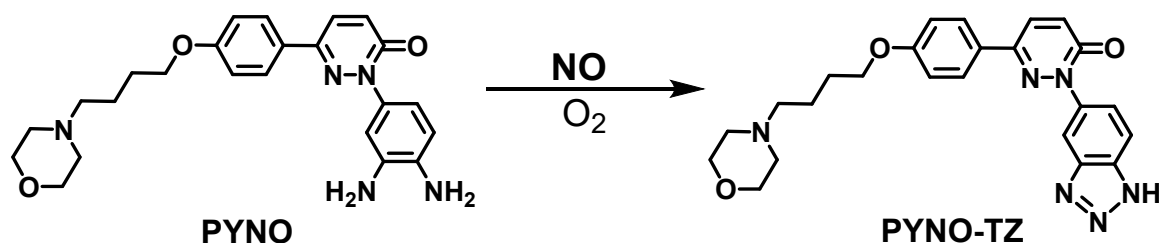

**Fig. S5** PYNO and its NO-adduct PYNO-TZ under aerobic condition.

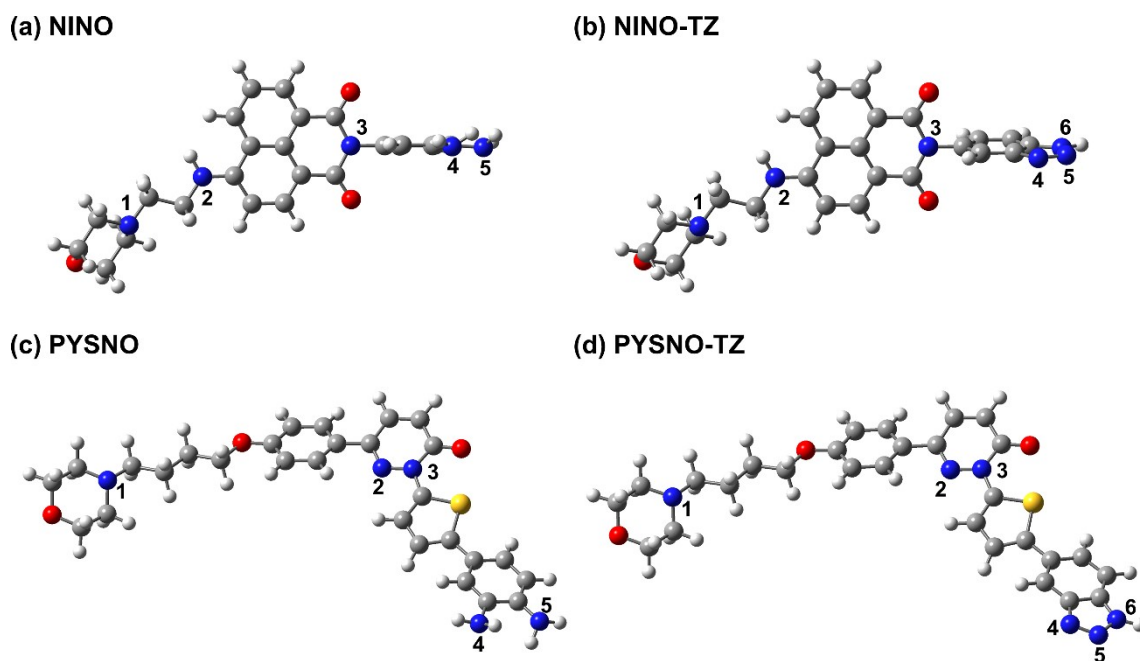

**Fig. S6** Assigned numbers for five N atoms in the probes and six N atoms in the reaction products for NINO (a), NINO-TZ (b), PYSNO (c) and PYSNO-TZ (d).

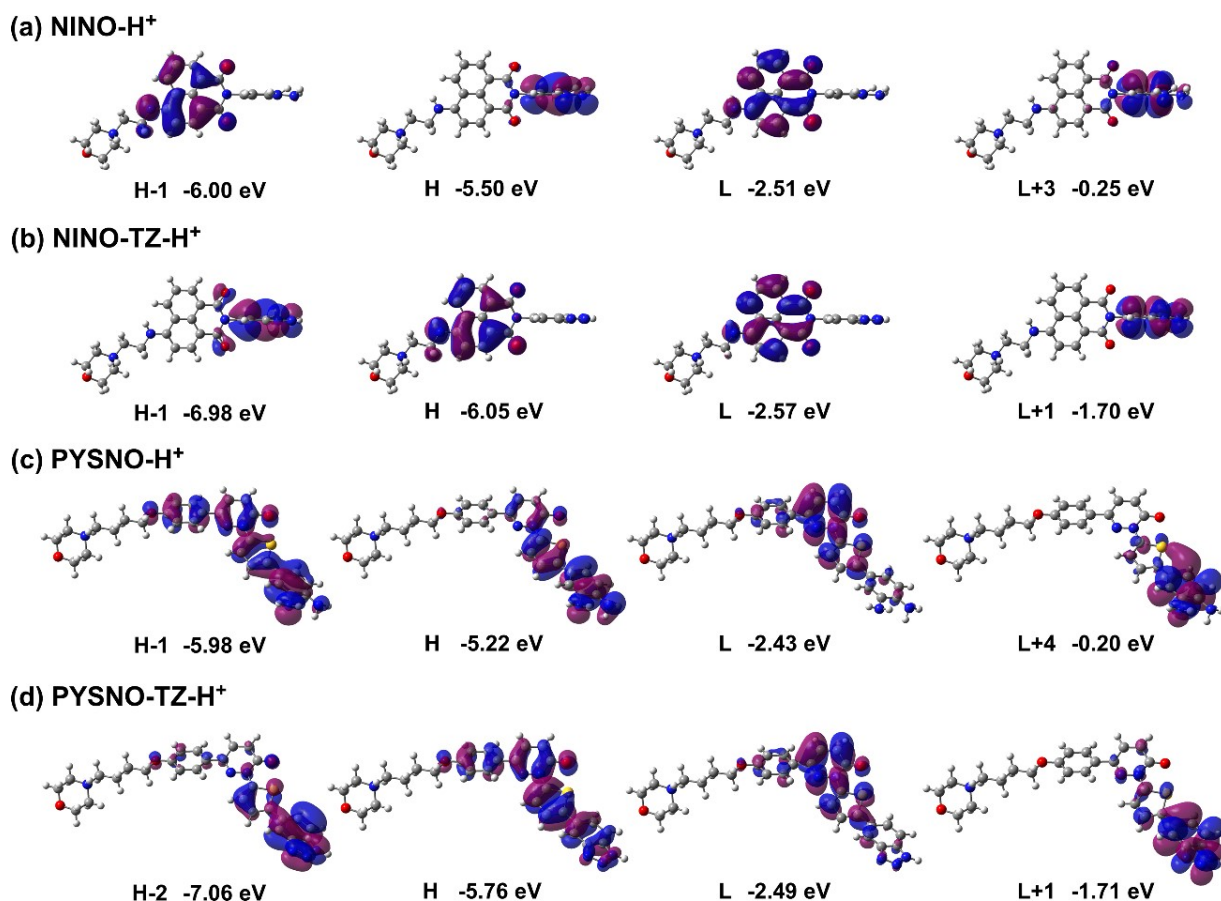

**Fig. S7** Spatial distributions involved in the four-level FMO diagrams for NINO-H<sup>+</sup> (a), NINO-TZ-H<sup>+</sup> (b), PYSNO-H<sup>+</sup> (c), and PYSNO-TZ-H<sup>+</sup> (d).

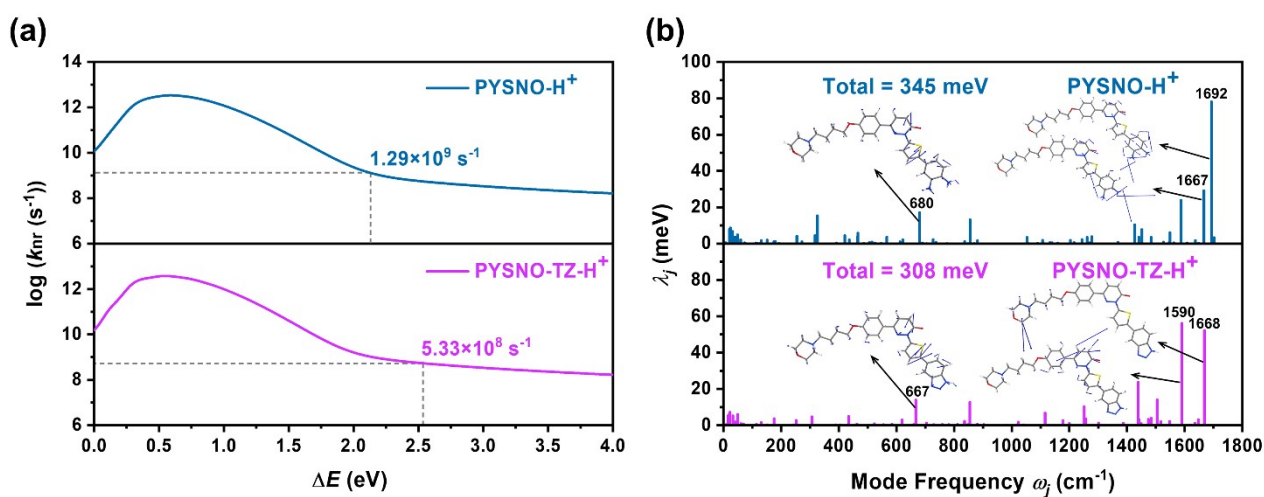

**Fig. S8** Calculated logarithm of the non-radiative decay rate  $\log(k_{nr})$  versus the energy gap  $\Delta E$  ( $T = 298$  K). The vertical dash line indicates the position of the adiabatic energy gap  $\Delta E_{ad}$  (a) and relaxation energies  $\lambda_j$  (b) versus mode frequency  $\omega_j$  for PYSNO-H<sup>+</sup> and PYSNO-TZ-H<sup>+</sup>.

**Table S1** Calculated absorption and emission wavelengths (in nm) by using different functionals based on the  $S_0(S_1)$ -optimized geometries at the level of B3LYP/6-31+G(d). The 6-311G(d,p) basis set and different solvent models (LR-PCM and SS-PCM) were further applied to the chosen B3LYP functional. The experimental peak values (Exp.) in water are also given.

| Abs.       |             |        |             |           |        |           |     |      |
|------------|-------------|--------|-------------|-----------|--------|-----------|-----|------|
| Functional | B3LYP       |        | B3LYP PBE33 | BMK       | M062X  | CAM-B3LYP |     |      |
| Basis Set  | 6-311G(d,p) |        |             | 6-31+G(d) |        |           |     |      |
| PCM        | LR-PCM      | SS-PCM |             |           | LR-PCM |           |     | Exp. |
| NINO       | 420         | 440    | 427         | 384       | 356    | 320       | 312 | 430  |
| NINO-TZ    | 421         | 441    | 429         | 396       | 388    | 382       | 381 | 430  |
| PYSNO      | 512         | 662    | 509         | 439       | 414    | 391       | 390 | 460  |
| PYSNO-TZ   | 443         | 447    | 445         | 402       | 386    | 372       | 373 | 402  |
| Emi.       |             |        |             |           |        |           |     |      |
| NINO-TZ    | 477         | 588    | 502         | 444       | 433    | 426       | 423 | 530  |
| PYSNO      | 670         | 1012   | 708         | 572       | 534    | 497       | 492 | 581  |
| PYSNO-TZ   | 548         | 601    | 584         | 502       | 480    | 463       | 464 | 548  |

**Table S2** The excitation energies  $E_{\text{opa}}$  (eV), OPA wavelengths  $\lambda_{\text{opa}}$  (nm), oscillator strengths  $f$  and the transition natures of the lowest three excited states for NINO, NINO-TZ, PYSNO and PYSNO-TZ in water. Experimental values are also presented in parentheses.

|          | State | $E_{\text{opa}}$ | $\lambda_{\text{opa}}$ | $f$  | Transition nature |
|----------|-------|------------------|------------------------|------|-------------------|
| NINO     | $S_1$ | 2.62             | 473                    | 0.00 | H→L 99.6%         |
|          | $S_2$ | 2.96             | 420 (430)              | 0.33 | H-1→L 97.0%       |
|          | $S_3$ | 3.11             | 399                    | 0.00 | H-2→L 76.6%       |
| NINO-TZ  | $S_1$ | 2.94             | 421 (430)              | 0.33 | H→L 97.0%         |
|          | $S_2$ | 3.05             | 407                    | 0.00 | H-1→L 99.7%       |
|          | $S_3$ | 3.71             | 334                    | 0.00 | H→L+1 99.6%       |
| PYSNO    | $S_1$ | 2.42             | 512 (460)              | 0.41 | H→L 99.1%         |
|          | $S_2$ | 3.13             | 397 (402)              | 0.14 | H-1→L 97.6%       |
|          | $S_3$ | 3.47             | 358                    | 0.02 | H-3→L 94.3%       |
| PYSNO-TZ | $S_1$ | 2.80             | 443 (402)              | 0.56 | H→L 99.1%         |
|          | $S_2$ | 3.42             | 363                    | 0.02 | H-2→L 94.3%       |
|          | $S_3$ | 3.45             | 360                    | 0.00 | H-1→L 99.9%       |

**Table S3** The electronic energies  $E_{S_1(S_2)}$  (a.u.) at the  $S_1(S_2)$  minimum, the energy differences  $\Delta E$  (eV) and internal conversion rate constants  $k_{ic}$  ( $s^{-1}$ ) from  $S_2$  to  $S_1$  state for NINO, NINO-TZ, PYSNO and PYSNO-TZ in water.

|          | $E_{S_1}$  | $E_{S_2}$  | $\Delta E$ | $k_{ic}$              |
|----------|------------|------------|------------|-----------------------|
| NINO     | -1429.3843 | -1429.3548 | 0.80       | $5.12 \times 10^{10}$ |
| NINO-TZ  | -1482.2682 | -1482.2422 | 0.71       | $7.16 \times 10^{10}$ |
| PYSNO    | -1983.5920 | -1983.5661 | 0.71       | $7.16 \times 10^{10}$ |
| PYSNO-TZ | -2036.4862 | -2036.4630 | 0.63       | $9.63 \times 10^{10}$ |

**Table S4** The oscillator strengths  $f$ , vertical emission energies  $E_{emi}$  (eV) and radiative decay rate constants  $k_r$  ( $s^{-1}$ ) from  $S_1$  to  $S_0$  state for NINO, NINO-TZ, PYSNO and PYSNO-TZ in water.

|          | $f$    | $E_{emi}$ | $k_r$              |
|----------|--------|-----------|--------------------|
| NINO     | 0.0007 | 1.49      | $6.74 \times 10^4$ |
| NINO-TZ  | 0.25   | 2.60      | $7.33 \times 10^7$ |
| PYSNO    | 0.48   | 1.85      | $7.12 \times 10^7$ |
| PYSNO-TZ | 0.66   | 2.26      | $1.46 \times 10^8$ |

**Table S5** The excitation energies  $E_{\text{tpa}}$  (eV), TPA wavelengths  $\lambda_{\text{tpa}}$  (nm), TPA strength  $\delta_{\text{tp}}$  (a.u.) and cross sections  $\sigma_{\text{tpa}}$  (GM) of the lowest ten excited states for NINO, NINO-TZ, PYSNO and PYSNO-TZ in water.

|       | $E_{\text{tpa}}$ | $\lambda_{\text{tpa}}$ | $\delta_{\text{tp}}$ | $\sigma_{\text{tpa}}$ |          | $E_{\text{tpa}}$ | $\lambda_{\text{tpa}}$ | $\delta_{\text{tp}}$ | $\sigma_{\text{tpa}}$ |
|-------|------------------|------------------------|----------------------|-----------------------|----------|------------------|------------------------|----------------------|-----------------------|
| NINO  | 2.53             | 978                    | 273                  | 1                     | NINO-TZ  | 2.88             | 859                    | 5630                 | 34                    |
|       | 2.90             | 853                    | 4880                 | 30                    |          | 3.04             | 814                    | 1570                 | 11                    |
|       | 3.10             | 798                    | 1930                 | 14                    |          | 3.74             | 661                    | 1000                 | 10                    |
|       | 3.44             | 719                    | 582                  | 5                     |          | 3.80             | 651                    | 58                   | 1                     |
|       | 3.86             | 641                    | 6                    | 0                     |          | 4.00             | 618                    | 13                   | 0                     |
|       | 4.02             | 615                    | 205                  | 2                     |          | 4.02             | 615                    | 176                  | 2                     |
|       | 4.07             | 608                    | 61                   | 1                     |          | 4.07             | 608                    | 459                  | 6                     |
|       | 4.08             | 606                    | 4                    | 0                     |          | 4.33             | 571                    | 2660                 | 37                    |
|       | 4.33             | 571                    | 1280                 | 18                    |          | 4.37             | 566                    | 1310                 | 18                    |
|       | 4.36             | 567                    | 18                   | 0                     |          | 4.41             | 561                    | 4260                 | 61                    |
| PYSNO | 2.35             | 1052                   | 189000               | 765                   | PYSNO-TZ | 2.71             | 913                    | 29200                | 157                   |
|       | 3.09             | 800                    | 106000               | 742                   |          | 3.40             | 727                    | 137000               | 1161                  |
|       | 3.45             | 717                    | 72900                | 636                   |          | 3.46             | 715                    | 74                   | 1                     |
|       | 3.51             | 705                    | 55                   | 0                     |          | 3.54             | 699                    | 47000                | 432                   |
|       | 3.63             | 681                    | 70600                | 682                   |          | 3.93             | 629                    | 1450                 | 16                    |
|       | 3.84             | 644                    | 72900                | 788                   |          | 4.04             | 612                    | 26900                | 322                   |
|       | 3.92             | 631                    | 9230                 | 104                   |          | 4.11             | 602                    | 48800                | 604                   |
|       | 3.96             | 625                    | 54200                | 623                   |          | 4.20             | 589                    | 4070                 | 53                    |
|       | 4.14             | 597                    | 5                    | 0                     |          | 4.25             | 582                    | 18300                | 242                   |
|       | 4.23             | 585                    | 7840                 | 103                   |          | 4.26             | 581                    | 12600                | 168                   |

**Table S6** Two-photon transition matrix element  $S_{\alpha\beta}$  (a.u.) for the representative  $S_2$  states of NINO and PYSNO in water.

|       | Number of states | $S_{xx}$ | $S_{yy}$ | $S_{zz}$ | $S_{xy}$ | $S_{xz}$ | $S_{yz}$ |
|-------|------------------|----------|----------|----------|----------|----------|----------|
| NINO  | 6                | 150.40   | -7.40    | -0.90    | -43.20   | -7.00    | -0.50    |
|       | 8                | 150.50   | -7.40    | -0.90    | -43.20   | -7.00    | -0.50    |
|       | 10               | -150.40  | 7.40     | 0.90     | 43.20    | 7.00     | 0.50     |
|       | 12               | 150.40   | -7.40    | -0.90    | -43.20   | -7.00    | -0.50    |
|       | 14               | 150.40   | -7.40    | -0.90    | -43.20   | -7.00    | -0.50    |
| PYSNO | 6                | 508.50   | 227.50   | -0.60    | -325.10  | 16.20    | -15.90   |
|       | 8                | -508.40  | -227.50  | 0.60     | 325.10   | -16.20   | 15.90    |
|       | 10               | 508.40   | 227.50   | -0.60    | 325.10   | 16.20    | -15.90   |
|       | 12               | -508.40  | -227.50  | 0.60     | 325.10   | -16.20   | 15.90    |
|       | 14               | 508.40   | 227.50   | -0.60    | -325.10  | 16.20    | -15.90   |

**Table S7** The excitation energies  $E_{\text{tpa}}$  (eV), TPA wavelengths  $\lambda_{\text{tpa}}$  (nm), TPA strength  $\delta_{\text{tp}}$  (a.u.) and cross sections  $\sigma_{\text{tpa}}$  (GM) of the lowest ten excited states for PYNO and PYNO-TZ in water.

|      | $E_{\text{tpa}}$ | $\lambda_{\text{tpa}}$ | $\delta_{\text{tp}}$ | $\sigma_{\text{tpa}}$ |         | $E_{\text{tpa}}$ | $\lambda_{\text{tpa}}$ | $\delta_{\text{tp}}$ | $\sigma_{\text{tpa}}$ |
|------|------------------|------------------------|----------------------|-----------------------|---------|------------------|------------------------|----------------------|-----------------------|
| PYNO | 2.94             | 841                    | 236                  | 1                     | PYNO-TZ | 3.35             | 738                    | 2810                 | 23                    |
|      | 3.46             | 715                    | 3180                 | 28                    |         | 3.75             | 659                    | 14                   | 0                     |
|      | 3.86             | 641                    | 1240                 | 14                    |         | 3.83             | 646                    | 1340                 | 14                    |
|      | 3.87             | 639                    | 23                   | 0                     |         | 3.94             | 628                    | 2990                 | 34                    |
|      | 4.04             | 612                    | 425                  | 5                     |         | 4.19             | 590                    | 14600                | 188                   |
|      | 4.08             | 606                    | 247                  | 3                     |         | 4.24             | 583                    | 0                    | 0                     |
|      | 4.41             | 561                    | 9730                 | 139                   |         | 4.37             | 566                    | 2700                 | 38                    |
|      | 4.44             | 557                    | 1710                 | 25                    |         | 4.41             | 561                    | 942                  | 13                    |
|      | 4.54             | 545                    | 791                  | 12                    |         | 4.47             | 553                    | 805                  | 12                    |
|      | 4.55             | 544                    | 220                  | 3                     |         | 4.64             | 533                    | 591                  | 9                     |

**Table S8** The electronic energies (a.u.) and relative values (eV) of the optimized geometries for the protonated conformations named NINO-H<sup>+</sup>, NINO-TZ-H<sup>+</sup>, PYSNO-H<sup>+</sup> and PYSNO-TZ-H<sup>+</sup>. The site numbers can be referred to Fig. S6.

|                        | Site | Energy     | Relative |                         | Site | Energy     | Relative |
|------------------------|------|------------|----------|-------------------------|------|------------|----------|
| NINO-H <sup>+</sup>    | 1    | -1429.5983 | 0.00     | PYSNO-H <sup>+</sup>    | 1    | -1983.7557 | 0.00     |
|                        | 2    | -1429.5692 | 0.74     |                         | 2    | -1983.7215 | 0.93     |
|                        | 3    | -1429.5335 | 1.71     |                         | 3    | -1983.6702 | 2.33     |
|                        | 4    | -1429.5859 | 0.28     |                         | 4    | -1983.7368 | 0.51     |
|                        | 5    | -1429.5859 | 0.28     |                         | 5    | -1983.7369 | 0.51     |
| NINO-TZ-H <sup>+</sup> | 1    | -1482.5093 | 0.00     | PYSNO-TZ-H <sup>+</sup> | 1    | -2036.6658 | 0.00     |
|                        | 2    | -1482.4813 | 0.76     |                         | 2    | -2036.6300 | 0.97     |
|                        | 3    | -1482.4427 | 1.81     |                         | 3    | -2036.5783 | 2.38     |
|                        | 4    | -1482.4915 | 0.48     |                         | 4    | -2036.6442 | 0.59     |
|                        | 5    | -1482.4744 | 0.95     |                         | 5    | -2036.6263 | 1.07     |
|                        | 6    | -1482.4460 | 1.72     |                         | 6    | -2036.5986 | 1.83     |

**Table S9** The excitation energies  $E_{\text{opa}}$  (eV), corresponding OPA wavelengths  $\lambda_{\text{opa}}$  (nm), oscillator strengths  $f$  and transition natures of the lowest three excited states for NINO-H<sup>+</sup>, NINO-TZ-H<sup>+</sup>, PYSNO-H<sup>+</sup> and PYSNO-TZ-H<sup>+</sup> in water.

|                         | State          | $E_{\text{opa}}$ | $\lambda_{\text{opa}}$ | $f$  | Transition nature |
|-------------------------|----------------|------------------|------------------------|------|-------------------|
| NINO-H <sup>+</sup>     | S <sub>1</sub> | 2.51             | 493                    | 0.00 | H→L 99.6%         |
|                         | S <sub>2</sub> | 3.08             | 403                    | 0.34 | H-1→L 97.0%       |
|                         | S <sub>3</sub> | 3.43             | 361                    | 0.00 | H-2→L 98.5%       |
| NINO-TZ-H <sup>+</sup>  | S <sub>1</sub> | 3.06             | 405                    | 0.35 | H→L 97.0%         |
|                         | S <sub>2</sub> | 3.79             | 327                    | 0.00 | H-1→L 65.9%       |
|                         | S <sub>3</sub> | 3.92             | 316                    | 0.00 | H→L+1 99.7%       |
| PYSNO-H <sup>+</sup>    | S <sub>1</sub> | 2.41             | 513                    | 0.41 | H→L 99.1%         |
|                         | S <sub>2</sub> | 3.13             | 396                    | 0.14 | H-1→L 97.7%       |
|                         | S <sub>3</sub> | 3.48             | 356                    | 0.02 | H-2→L 93.9%       |
| PYSNO-TZ-H <sup>+</sup> | S <sub>1</sub> | 2.80             | 443                    | 0.56 | H→L 99.1%         |
|                         | S <sub>2</sub> | 3.44             | 360                    | 0.02 | H-1→L 93.2%       |
|                         | S <sub>3</sub> | 3.59             | 345                    | 0.00 | H→L+1 91.2%       |



**Table S10** The oscillator strengths  $f$ , vertical emission energies  $E_{\text{emi}}$  (eV) and radiative decay rate constants  $k_r$  ( $\text{s}^{-1}$ ) from  $S_1$  to  $S_0$  state for NINO- $\text{H}^+$ , NINO-TZ- $\text{H}^+$ , PYSNO- $\text{H}^+$  and PYSNO-TZ- $\text{H}^+$  in water.

|                        | $f$    | $E_{\text{emi}}$ | $k_r$              |
|------------------------|--------|------------------|--------------------|
| NINO- $\text{H}^+$     | 0.0006 | 1.40             | $5.10 \times 10^4$ |
| NINO-TZ- $\text{H}^+$  | 0.27   | 2.69             | $8.47 \times 10^7$ |
| PYSNO- $\text{H}^+$    | 0.48   | 1.85             | $7.12 \times 10^7$ |
| PYSNO-TZ- $\text{H}^+$ | 0.66   | 2.26             | $1.46 \times 10^8$ |

**Table S11** The excitation energies  $E_{\text{tpa}}$  (eV), TPA wavelengths  $\lambda_{\text{tpa}}$  (nm), TPA strength  $\delta_{\text{tp}}$  (a.u.) and cross sections  $\sigma_{\text{tpa}}$  (GM) of the lowest ten excited states for NINO- $\text{H}^+$ , NINO-TZ- $\text{H}^+$ , PYSNO- $\text{H}^+$  and PYSNO-TZ- $\text{H}^+$  in water.

|                     | $E_{\text{tpa}}$ | $\lambda_{\text{tpa}}$ | $\delta_{\text{tp}}$ | $\sigma_{\text{tpa}}$ |                        | $E_{\text{tpa}}$ | $\lambda_{\text{tpa}}$ | $\delta_{\text{tp}}$ | $\sigma_{\text{tpa}}$ |
|---------------------|------------------|------------------------|----------------------|-----------------------|------------------------|------------------|------------------------|----------------------|-----------------------|
| NINO- $\text{H}^+$  | 2.37             | 1044                   | 425                  | 2                     | NINO-TZ- $\text{H}^+$  | 3.05             | 811                    | 2890                 | 20                    |
|                     | 3.07             | 806                    | 2580                 | 18                    |                        | 3.71             | 667                    | 81                   | 1                     |
|                     | 3.30             | 749                    | 753                  | 6                     |                        | 3.94             | 628                    | 409                  | 5                     |
|                     | 3.79             | 653                    | 3                    | 0                     |                        | 4.04             | 612                    | 106                  | 1                     |
|                     | 3.92             | 631                    | 63                   | 1                     |                        | 4.05             | 611                    | 777                  | 9                     |
|                     | 3.95             | 626                    | 25                   | 0                     |                        | 4.23             | 585                    | 413                  | 5                     |
|                     | 4.05             | 611                    | 127                  | 2                     |                        | 4.36             | 567                    | 6                    | 0                     |
|                     | 4.30             | 575                    | 3                    | 0                     |                        | 4.42             | 560                    | 695                  | 10                    |
|                     | 4.37             | 566                    | 444                  | 6                     |                        | 4.48             | 552                    | 6570                 | 97                    |
|                     | 4.49             | 551                    | 5760                 | 85                    |                        | 4.65             | 532                    | 1710                 | 27                    |
| PYSNO- $\text{H}^+$ | 2.35             | 1052                   | 193000               | 781                   | PYSNO-TZ- $\text{H}^+$ | 2.71             | 913                    | 30900                | 166                   |
|                     | 3.09             | 800                    | 101000               | 707                   |                        | 3.42             | 723                    | 140000               | 1200                  |
|                     | 3.47             | 713                    | 83300                | 735                   |                        | 3.55             | 697                    | 44100                | 407                   |
|                     | 3.62             | 683                    | 67400                | 647                   |                        | 3.93             | 629                    | 1590                 | 18                    |
|                     | 3.83             | 646                    | 70500                | 758                   |                        | 4.03             | 614                    | 26300                | 313                   |
|                     | 3.92             | 631                    | 9870                 | 111                   |                        | 4.11             | 602                    | 45500                | 563                   |
|                     | 3.96             | 625                    | 55300                | 636                   |                        | 4.20             | 589                    | 4850                 | 63                    |
|                     | 4.13             | 599                    | 19                   | 0                     |                        | 4.26             | 581                    | 31900                | 424                   |
|                     | 4.22             | 586                    | 9730                 | 127                   |                        | 4.27             | 579                    | 519                  | 7                     |
|                     | 4.28             | 578                    | 33000                | 443                   |                        | 4.34             | 570                    | 4140                 | 57                    |

## References

- S1 S. H. Lin, *J. Chem. Phys.*, 1966, **44**, 3759-3767.  
S2 W. L. Peticolas, *Annu. Rev. Phys. Chem.*, 1967, **18**, 233-260.  
S3 K. Huang and A. Rhys, *Proc. R. Soc. Lond. A*, 1950, **204**, 406-423.  
S4 R. Englman and J. Jortner, *Mol. Phys.*, 1970, **18**, 145-164.
